# Supplementary material for: Lhx1 Is Required for Specification of the Renal Progenitor Cell Field
Source: PubMed Central journal article supplement (PMC3078140; doi:10.1371/journal.pone.0018858), 2011-04-15
Supplement: pone.0018858.s007.pdf [file pone.0018858.s007.pdf]

| <i>Gene Name/GenBank ID</i>                    | <i>Fold Increase</i> | <i>Fold decrease</i> | <i>WMIH</i> |
|------------------------------------------------|----------------------|----------------------|-------------|
| Protocadherin PCNS                             | 207                  | 4                    | +           |
| Teashirt zinc finger homeobox 3                | 162                  | 4                    | +           |
| <b>Caudal type homeo box 4</b>                 | 133                  | 6                    | +           |
| BM179670                                       | 127                  | 5                    | +           |
| Wingless-type MMTV integration site family, m  | 117                  | 4                    | +           |
| Lapl06 mRNA                                    | 99                   | 19                   | +           |
| MGC84445                                       | 90                   | 5                    | +           |
| Xcad1                                          | 86                   | 6                    | +           |
| <b>MGC131119 (Homeobox B4 like)</b>            | 80                   | 4                    | +           |
| <b>Homeobox B8 like</b>                        | 75                   | 5                    | +           |
| <b>BJ087999</b>                                | 70                   | 13                   | +           |
| Paired box 3                                   | 48                   | 4                    | +           |
| AW460602                                       | 44                   | 2                    | +           |
| Thylacine 1                                    | 34                   | 2                    | +           |
| <b>Marginal coil Xmc</b>                       | 26                   | 8                    | +           |
| MGC131003                                      | 25                   | 3                    | +           |
| Factor I C3b/C4b inactivator (Cfi)             | 24                   | 3                    | +           |
| Microfibrillar-associated protein 2            | 23                   | 7                    | +           |
| BF048418                                       | 22                   | 4                    | +           |
| <b>BG885063 (Neuropilin 1 like)</b>            | 22                   | 14                   | +           |
| BJ091281                                       | 21                   | 4                    | -           |
| AFFX-XI-a1Act-3_s_at                           | 20                   | 30                   | -           |
| Axin-related protein                           | 20                   | 3                    | +           |
| Wingless-type MMTV integration site family, m  | 19                   | 27                   | -           |
| <b>cDNA clone IMAGE:6949617 (hypothetical)</b> | 18                   | 5                    | +           |
| cDNA clone MGC:98998 IMAGE:5513759             | 17                   | 3                    | +           |
| <b>Follistatin</b>                             | 17                   | 4                    | +           |
| BJ077645                                       | 16                   | 4                    | +           |
| BI350356                                       | 13                   | 2                    | +           |
| BG346022                                       | 12                   | 6                    | -           |
| Kringle containing transmembrane protein 2     | 12                   | 5                    | +           |
| BJ056491                                       | 11                   | 7                    | +           |
| XMeis1-3                                       | 11                   | 6                    | +           |
| BJ044843                                       | 11                   | 7                    | -           |
| LOC446245                                      | 11                   | 7                    | +           |
| Secreted protein, acidic, cysteine-rich        | 10                   | 14                   | +           |
| Myosin light chain                             | 10                   | 4                    | -           |
| BG579880                                       | 10                   | 3                    | +           |
| CDNA clone MGC:82481                           | 9                    | 7                    | +           |
| <b>ecto-NOX disulfide-thiol exchanger 1</b>    | 8                    | 5                    | +           |
| BJ083371                                       | 8                    | 10                   | +           |
| <b>Riddle 2</b>                                | 8                    | 3                    | +           |
| BG161264                                       | 8                    | 5                    | -           |
| Collagen, type II, alpha 1                     | 8                    | 8                    | +           |
| LOC734178                                      | 8                    | 6                    | +           |
| Wingless-type MMTV integration site family, m  | 8                    | 11                   | +           |
| <b>Homeobox B7</b>                             | 8                    | 2                    | +           |
| BG730739                                       | 8                    | 8                    | -           |

|                                                |   |    |   |
|------------------------------------------------|---|----|---|
| Fibrillin 1                                    | 7 | 3  | + |
| BJ047004                                       | 7 | 24 | - |
| BJ078265                                       | 7 | 3  | + |
| <b>N-cadherin 5' non-coding region</b>         | 7 | 4  | + |
| BJ079589                                       | 7 | 5  | + |
| Retinoic acid receptor, alpha                  | 6 | 3  | + |
| MGC81784 protein                               | 6 | 3  | + |
| BJ075680                                       | 6 | 7  | + |
| BE490942                                       | 6 | 2  | - |
| Homeobox A3                                    | 6 | 3  | + |
| <b>BF428441 (PTPRF binding protein 2 like)</b> | 6 | 7  | + |
| BI447733                                       | 6 | 2  | - |
| <b>BG020018 (Rho/GEF domain like)</b>          | 5 | 2  | + |
| MGC53495                                       | 5 | 4  | + |
| AW766736                                       | 5 | 16 | - |
| <b>BM260404 (Cnpr05 mRNA)</b>                  | 5 | 3  | + |
| <b>BQ400974 (Laminin beta-1 chain precurs</b>  | 5 | 2  | + |
| Zinc finger protein GLI4                       | 5 | 3  | + |
| Fibroblast growth factor receptor 1            | 5 | 2  | + |
| <b>Ephrin-A3</b>                               | 5 | 3  | + |
| BJ085082                                       | 5 | 11 | - |
| LOC733321                                      | 5 | 7  | + |
| CB564510                                       | 5 | 7  | - |
| BG347424                                       | 5 | 13 | - |
| CB756533                                       | 5 | 4  | - |
| MGC84737 protein                               | 4 | 2  | + |
| BG345987                                       | 4 | 3  | - |
| XMeis1-2                                       | 4 | 3  | + |
| <b>Paired box gene 2</b>                       | 4 | 3  | + |
| LIN-28 like                                    | 4 | 2  | + |
| Meso05 mRNA                                    | 4 | 3  | + |
| SRY (sex determining region Y)-box 12          | 4 | 3  | + |
| Spondin-2                                      | 4 | 7  | + |
| Syntaxin binding protein 1                     | 4 | 20 | + |
